# Supplementary material for: Use of effective contraception following provision of the progestogen-only pill for women presenting to community pharmacies for emergency contraception (Bridge-It): a pragmatic cluster-randomised crossover trial
Source: PubMed Central journal article supplement (PMC7661838; doi:10.1016/s0140-6736(20)31785-2), 2020-11-14
Supplement: mmc1.pdf [file mmc1.pdf]

# THE LANCET

## Supplementary appendix

This appendix formed part of the original submission and has been peer reviewed. We post it as supplied by the authors.

Supplement to: Cameron ST, Glasier A, McDaid L, et al. Use of effective contraception following provision of the progestogen-only pill for women presenting to community pharmacies for emergency contraception (Bridge-It): a pragmatic cluster-randomised crossover trial. *Lancet* 2020; **396**: 1585–94.

**Supplemental Table 1. Inclusion and exclusion criteria and study outcomes**

|                                                                                                                                                                                                                                                                                                                                                                                                                                                                 |
|-----------------------------------------------------------------------------------------------------------------------------------------------------------------------------------------------------------------------------------------------------------------------------------------------------------------------------------------------------------------------------------------------------------------------------------------------------------------|
| <p><b>Inclusion Criteria</b></p> <ul style="list-style-type: none"><li>• Intake of EC (levonorgestrel)</li><li>• Able to give informed consent to participate in and to adhere to trial requirements</li><li>• Age <math>\geq 16</math> years</li><li>• Willing to give contact details and be contacted at four months by phone / SMS/e-mail or post</li><li>• Willing to give identifying data sufficient to allow data linkage with NHS registries</li></ul> |
| <p><b>Exclusion Criteria</b></p> <ul style="list-style-type: none"><li>• Contraindications to POP</li><li>• Taking medication that interacts with POP</li><li>• Already using hormonal contraception</li><li>• Requires interpreting services</li><li>• Pharmacist has concerns about non-consensual sex</li></ul>                                                                                                                                              |

POP= progestogen only pill

EC= emergency contraception

**Supplemental Table 2. Known reasons for ineligibility of those screened**

| <b>Reasons for ineligibility* (N=490)</b>                                                 | <b>n (%)</b> |
|-------------------------------------------------------------------------------------------|--------------|
| Does not require emergency contraception                                                  | 93(19.0)     |
| Does not have capacity to give informed consent                                           | 64(13.1)     |
| <16 years old                                                                             | 10(2.0)      |
| Not willing to give contact details and be contacted for follow up                        | 264(53.9)    |
| Not willing to give identifying data sufficient to allow data linkage with NHS registries | 262(53.5)    |
| Contraindication to the POP                                                               | 15(3.1)      |
| On medication that interacts with POP                                                     | 5(1.0)       |
| Already using a hormonal method of contraception                                          | 156(31.8)    |
| Requires an interpreting service                                                          | 10(2.0)      |
| Pharmacist has concerns about non-consensual sex                                          | 2(0.4)       |

\*women may appear in more than one category

POP= progestogen only pill

**Supplemental Table 3. Characteristics of responders and non-responders at four months (baseline data collected at recruitment)**

| Baseline variables                                |                             | Non-responders     | Responders         |
|---------------------------------------------------|-----------------------------|--------------------|--------------------|
| Age, mean (SD)                                    |                             | N=227<br>22.3(5.0) | N=406<br>22.8(5.7) |
| <b>Methods of contraception ever used</b>         |                             |                    |                    |
| Combined hormonal contraceptive (pill/patch/ring) |                             | 118(52.0%)         | 230(56.7%)         |
| Progestogen only pill                             |                             | 46(20.3%)          | 79(19.5%)          |
| Male condom                                       |                             | 157(69.2%)         | 350(86.2%)         |
| Progestogen only injectable                       |                             | 19(8.4%)           | 29(7.1%)           |
| Progestogen only implant                          |                             | 29(12.8%)          | 52(12.8%)          |
| Cu-IUD                                            |                             | 3(1.3%)            | 11(2.7%)           |
| LNG-IUS                                           |                             | 2(0.9%)            | 5(1.2%)            |
| Female condom                                     |                             | 0                  | 3(0.7%)            |
| Cap or Diaphragm                                  |                             | 0                  | 6(1.5%)            |
| Vasectomy                                         |                             | 1(0.4%)            | 3(0.7%)            |
| Withdrawal method                                 |                             | 62(27.3%)          | 150(36.9%)         |
| Fertility based awareness method                  |                             | 7(3.1%)            | 13(3.2%)           |
| Other method                                      |                             | 1(0.4%)            | 2(0.5%)            |
| Never Used Any Method                             |                             | 11(4.8%)           | 13(3.2%)           |
| Previous birth                                    | Yes                         | 16(7.0%)           | 39(9.6%)           |
| Previous abortion                                 | Yes                         | 36(15.9%)          | 57(14.0%)          |
| Previous miscarriage                              | Yes                         | 16(7.0%)           | 22(5.4%)           |
| Current sexual relationship                       | Yes                         | 154(67.8%)         | 292(71.9%)         |
| First time ever use of EC                         | Yes                         | 44(19.4%)          | 90(22.2%)          |
| No. times used EC in the last 12 months           | Mean (SD)                   | 1.5,(1.2)          | 1.5,(1.7)          |
|                                                   | Median (25th, 75th centile) | 1.0;[1.0,2.0]      | 1.0;[1.0,2.0]      |
|                                                   | Min, Max                    | (0.0,6.0)          | (0.0,20.0)         |
| Ethnic Background                                 | White                       | 134(59.0%)         | 295(72.7%)         |
|                                                   | Asian or Asian British      | 25(11.0%)          | 31(7.6%)           |
|                                                   | Black or Black British      | 42(18.5%)          | 50(12.3%)          |
|                                                   | Mixed or Others             | 23(10.1%)          | 25(6.2%)           |
|                                                   | Missing                     | 3(1.3%)            | 5(1.2%)            |

Cu-IUD = copper bearing intrauterine device

LNG-IUS= levonorgestrel releasing intrauterine system

**Supplemental Table 4. Contraceptive use at four-months follow up**

| Variables                                                               |                                                 | Intervention  | Control        |
|-------------------------------------------------------------------------|-------------------------------------------------|---------------|----------------|
|                                                                         |                                                 | N=198         | N=208          |
| Methods of contraception used now*                                      | Combined hormonal contraceptive pill/patch/ring | 28/198(14.1%) | 47/208(22.6%)  |
|                                                                         | POP                                             | 71/198(35.9%) | 15/208(7.2%)   |
|                                                                         | Male condom                                     | 31/198(15.7%) | 63/208(30.3%)  |
|                                                                         | Progestogen only injectable                     | 4/198(2.0%)   | 4/208(1.9%)    |
|                                                                         | Progestogen only implant                        | 3/198(1.5%)   | 11/208(5.3%)   |
|                                                                         | Cu- IUD                                         | 3/198(1.5%)   | 4/208(1.9%)    |
|                                                                         | LNG-IUS                                         | 3/198(1.5%)   | 4/208(1.9%)    |
|                                                                         | Other method                                    | 0             | 1/208(0.5%)    |
|                                                                         | Not using any method                            | 57/198(28.8%) | 62/208(29.8%)  |
|                                                                         | LARC**                                          | 13/198(6.5%)  | 23/208 (11.1%) |
| When did the participant start using this contraceptive method          | The same day that took the EC                   | 18/141(12.8%) | 14/146(9.6%)   |
|                                                                         | The day after took the EC                       | 38/141(27.0%) | 7/146(4.8%)    |
|                                                                         | With start of period after EC                   | 13/141(9.2%)  | 23/146(15.8%)  |
|                                                                         | Other                                           | 48/141(34.0%) | 62/146(42.5%)  |
|                                                                         | Missing                                         | 24/141(17.0%) | 40/146(27.4%)  |
| Where did the participant get the current methods of contraception from | GP Clinic                                       | 74/141(52.5%) | 53/146(36.3%)  |
|                                                                         | At a SRH clinic                                 | 34/141(24.1%) | 35/146(24.0%)  |
|                                                                         | Other                                           | 21/141(14.9%) | 40/146(27.4%)  |

POP= progestogen only pill

EC= emergency contraception

Cu-IUD = copper bearing intrauterine device

LNG-IUS= levonorgestrel releasing intrauterine system

\*Participants could use more than one method

\*\*LARC includes Cu-IUD, LNG-IUS, progestogen only implant and injectable

**Supplemental Table 5. Reasons for not using effective contraception at four months and further use of emergency contraception**

|                                               |                                                     | <b>Intervention<br/>N=57*</b> | <b>Control<br/>N=62</b> |
|-----------------------------------------------|-----------------------------------------------------|-------------------------------|-------------------------|
| Reasons for not using effective contraception | Not currently sexually active                       | 27/57(47.4%)                  | 28/62(45.2%)            |
|                                               | Worried about side effects with contraception       | 12/57(21.1%)                  | 21/62(33.9%)            |
|                                               | Due to medical reasons                              | 1/57(1.8%)                    | 2/62(3.2%)              |
|                                               | Not decided on method to be used                    | 9/57(15.8%)                   | 11/62(17.7%)            |
|                                               | Difficult to get appointment for GP or a SRH clinic | 8/57(14.0%)                   | 4/62(6.5%)              |
|                                               | Difficult to find time to get to GP or a SRH clinic | 6/57(10.5%)                   | 4/62(6.5%)              |
|                                               | Trying for baby                                     | 1/57(1.8%)                    | 0                       |
|                                               | Other                                               | 8/57(14.0%)                   | 5/62(8.1%)              |
| Further use of EC since entering study        | Yes                                                 | 20/198(10.1%)                 | 37/208(17.8%)           |
| How many times EC used since                  | Mean (SD)                                           | 1.6,(1.2);[N=19]              | 1.5,(0.8);[N=36]        |
|                                               | Median (25th centile, 75th centile)                 | 1.0;[1.0,2.0]                 | 1.0;[1.0,2.0]           |
|                                               | Min, Max                                            | (1.0,5.0)                     | (1.0,5.0)               |

EC= emergency contraception

GP= general practitioner

SRH= sexual and reproductive health clinic (any)

\*45 out of these 57 women in the intervention group (79%) used the POP supplied by the pharmacist

**Supplemental Table 6. Provision of ongoing contraceptive advice by pharmacy as reported by participants at four-months follow-up.**

|                                                                                        |     | <b>Intervention</b> | <b>Control</b> | <b>Effect size</b>                       |
|----------------------------------------------------------------------------------------|-----|---------------------|----------------|------------------------------------------|
|                                                                                        |     | N=198               | N=208          |                                          |
| Did the pharmacy provide participant with information about starting contraception     | No  | 2(1.0%)             | 46(22.1%)      | 0.216(0.156,0.277);<br><i>p&lt;0.001</i> |
|                                                                                        | Yes | 194(98.0%)          | 157(75.5%)     |                                          |
| Did the pharmacy provide participant with information about where to get contraception | No  | 19(9.6%)            | 67(32.2%)      | 0.237(0.159,0.315);<br><i>p&lt;0.001</i> |
|                                                                                        | Yes | 178(89.9%)          | 134(64.4%)     |                                          |

**Supplemental Table 7: Use of progestogen only pill (POP) over four months by participants in intervention group**

| Variables                                              |                                           | Intervention N=198 |
|--------------------------------------------------------|-------------------------------------------|--------------------|
| Used any of the POP that the pharmacist gave           | Yes                                       | 158/198(79.8%)     |
|                                                        | No                                        | 35/198(17.7%)      |
|                                                        | Missing                                   | 5/198(2.5%)        |
| If not, why*                                           | Not with a regular partner                | 8/35(22.9%)        |
|                                                        | Not requiring regular contraception       | 7/35(20.0%)        |
|                                                        | Worried about possible side effects       | 10/35(28.6%)       |
|                                                        | Didn't understand to use it               | 1/35(2.9%)         |
|                                                        | Preferred to start another contraceptive  | 6/35(17.1%)        |
|                                                        | Used POP in the past and it did not agree | 1/35(2.9%)         |
|                                                        | Preferred to see GP for contraception     | 2/35(5.7%)         |
| Other                                                  | 10/35(28.6%)                              |                    |
| When did the participant start the POP                 | Same day took EC                          | 27/158(17.1%)      |
|                                                        | Day after took EC                         | 93/158(58.9%)      |
|                                                        | With the start of next period after EC    | 19/158(12.0%)      |
|                                                        | Other                                     | 16/158(10.1%)      |
|                                                        | Missing                                   | 3/158(1.9%)        |
| Number of packets of POP used                          | < 1 packet                                | 15/158(9.5%)       |
|                                                        | 1 packet                                  | 17/158(10.8%)      |
|                                                        | < 2 packets                               | 13/158(8.2%)       |
|                                                        | 2 packets                                 | 8/158(5.1%)        |
|                                                        | < 3 packets                               | 10/158(6.3%)       |
|                                                        | 3 packets                                 | 70/158(44.3%)      |
|                                                        | Still taking the POP                      | 22/158(13.9%)      |
|                                                        | Missing                                   | 3/158(1.9%)        |
| Main reason for stopping POP before the supply ran out | Due to side effects                       | 40/158(25.3%)      |
|                                                        | Started another method                    | 6/158(3.8%)        |
|                                                        | Other                                     | 22/158(13.9%)      |
|                                                        | Missing                                   | 90/158(57.0%)      |

EC= emergency contraception

\*More than one answer could be given



**Supplemental Table 8: Use of rapid access card to get appointment at the Sexual and Reproductive Health (SRH) Clinic**

| Variables                                                                                                   |                                                          | Intervention      |                  |
|-------------------------------------------------------------------------------------------------------------|----------------------------------------------------------|-------------------|------------------|
|                                                                                                             |                                                          | Period 1<br>N=147 | Period 2<br>N=51 |
| Did the pharmacist give the participant a 'rapid access card' to get an appointment at the study SRH clinic | Yes                                                      | 105/147(71.4%)    | 32/51(62.7%)     |
|                                                                                                             | No                                                       | 25/147(17.0%)     | 5/51(9.8%)       |
|                                                                                                             | I cannot remember                                        | 12/147(8.2%)      | 12/51(23.5%)     |
|                                                                                                             | Missing                                                  | 5/147(3.4%)       | 2/51(3.9%)       |
| Did the participant attend the study SRH clinic                                                             | Yes                                                      | 25/117(21.4%)     | 6/44(13.6%)      |
|                                                                                                             | No                                                       | 90/117(76.9%)     | 35/44(79.5%)     |
|                                                                                                             | Missing                                                  | 2/117(1.7%)       | 3/44(6.8%)       |
| If no, why                                                                                                  | Not requiring contraception                              | 19/90(21.1%)      | 9/35(25.7%)      |
|                                                                                                             | Preferred to see GP for contraception                    | 45/90(50.0%)      | 17/35(48.6%)     |
|                                                                                                             | Preferred to attend another SRH clinic for contraception | 5/90(5.6%)        | 0                |
|                                                                                                             | Other                                                    | 22/90(24.4%)      | 8/35(22.9%)      |
| When did the participant go to the SRH clinic                                                               | The same day took the EC                                 | 1/25(4.0%)        | 0                |
|                                                                                                             | < 1 month after the EC                                   | 1/25(4.0%)        | 0                |
|                                                                                                             | 1 to 2 months after the EC                               | 2/25(8.0%)        | 1/6(16.7%)       |
|                                                                                                             | 2 to 3 months after the EC                               | 12/25(48.0%)      | 3/6(50.0%)       |
|                                                                                                             | 3 to 4 months after the EC                               | 4/25(16.0%)       | 1/6(16.7%)       |
|                                                                                                             | Other                                                    | 4/25(16.0%)       | 0                |
|                                                                                                             | Missing                                                  | 1/25(4.0%)        | 1/6(16.7%)       |
| Did participant remember to take rapid access card to get appointment at study SRH clinic                   | Yes                                                      | 14/25(56.0%)      | 3/6(50.0%)       |
|                                                                                                             | No                                                       | 11/25(44.0%)      | 2/6(33.3%)       |
|                                                                                                             | Missing                                                  | 0                 | 1/6(16.7%)       |
| If participant did not take rapid access card, were they refused an appointment                             | Yes                                                      | 1/11(9.1%)        | 0                |
|                                                                                                             | No                                                       | 10/11(90.9%)      | 2/2(100.0%)      |
| How long did participant wait to be seen at the SRH clinic                                                  | < 30 mins                                                | 8/25(32.0%)       | 3/6(50.0%)       |
|                                                                                                             | < 1 hour                                                 | 7/25(28.0%)       | 1/6(16.7%)       |
|                                                                                                             | 1-2 hours                                                | 8/25(32.0%)       | 1/6(16.7%)       |
|                                                                                                             | Other                                                    | 2/25(8.0%)        | 0                |
|                                                                                                             | Missing                                                  | 0                 | 1/6(16.7%)       |
| Did study SRH clinic provide participant with a method of contraception                                     | Yes                                                      | 19/25(76.0%)      | 5/6(83.3%)       |
|                                                                                                             | No                                                       | 6/25(24.0%)       | 0                |
|                                                                                                             | Missing                                                  | 0                 | 1/6(16.7%)       |
| Did SRH clinic provide participant with the participants preferred method of contraception                  | Yes                                                      | 16/25(64.0%)      | 5/6(83.3%)       |
|                                                                                                             | No                                                       | 8/25(32.0%)       | 0                |
|                                                                                                             | Missing                                                  | 1/25(4.0%)        | 1/6(16.7%)       |
| If no, why                                                                                                  | Not enough staff or time                                 | 2/8(25.0%)        | 0                |
|                                                                                                             | Risk of pregnancy                                        | 1/8(12.5%)        | 0                |
|                                                                                                             | Other                                                    | 6/8(75.0%)        | 0                |
| Method of contraception received                                                                            | Progestogen only implant                                 | 1/25(4.0%)        | 0                |
|                                                                                                             | Progestogen only injectable                              | 0                 | 0                |
|                                                                                                             | Cu-IUD                                                   | 1/25(4.0%)        | 0                |
|                                                                                                             | LNG-IUS                                                  | 2/25(8.0%)        | 1/6(16.7%)       |
|                                                                                                             | Combined hormonal contraceptive pill/patch/ring          | 3/25(12.0%)       | 0                |
|                                                                                                             | Progestogen only pill                                    | 12/25(48.0%)      | 4/6(66.7%)       |
|                                                                                                             | Male condom                                              | 2/25(8.0%)        | 0                |
| Experience of the rapid access system to study SRH clinic                                                   | Smooth                                                   | 16/25(64.0%)      | 3/6(50.0%)       |
|                                                                                                             | Neither/Nor                                              | 6/25(24.0%)       | 2/6(33.3%)       |
|                                                                                                             | Problematic                                              | 1/25(4.0%)        | 0                |
|                                                                                                             | Missing                                                  | 2/25(8.0%)        | 1/6(16.7%)       |

**Supplemental Table 9. Data from the study Sexual and Reproductive Health (SRH) clinics.**

|                                                   |     | <b>Intervention</b> | <b>Control</b> |
|---------------------------------------------------|-----|---------------------|----------------|
|                                                   |     | N=305               | N=309          |
| Attended the study SRH clinic                     | No  | 253/305(83.0%)      | 266/309(86.1%) |
|                                                   | Yes | 52/305(17.0%)       | 43/309(13.9%)  |
| Method of contraception provided at this visit    | Yes | 26/52(50.0%)        | 15/43(34.9%)   |
| Progestogen only implant                          |     | 2/26(7.7%)          | 3/15(20.0%)    |
| Cu-IUD                                            |     | 1/26(3.8%)          | 4/15(26.7%)    |
| LNG-IUS                                           |     | 1/26(3.8%)          | 3/15(20.0%)    |
| Progestogen only injectable                       |     | 0                   | 0              |
| Combined hormonal contraceptive (pill/patch/ring) |     | 3/26(11.5%)         | 1/15(6.7%)     |
| POP                                               |     | 16/26(61.5%)        | 2/15(13.3%)    |
| Male Condom                                       |     | 3/26(11.5%)         | 3/15(20.0%)    |
| Other Method                                      |     | 1/26(3.8%)          | 0              |

POP= progestogen only pill

Cu-IUD = copper bearing intrauterine device

LNG-IUS= levonorgestrel releasing intrauterine system
